# Supplementary figures and images for: Multiple centrosomes enhance migration and immune cell effector functions of mature dendritic cells
Source: PubMed Central journal article supplement — J Cell Biol. 2022 Oct 10;221(12):e202107134. doi: 10.1083/jcb.202107134 (PMC9555069; doi:10.1083/jcb.202107134), 2022-10-10

**Fig. 3**

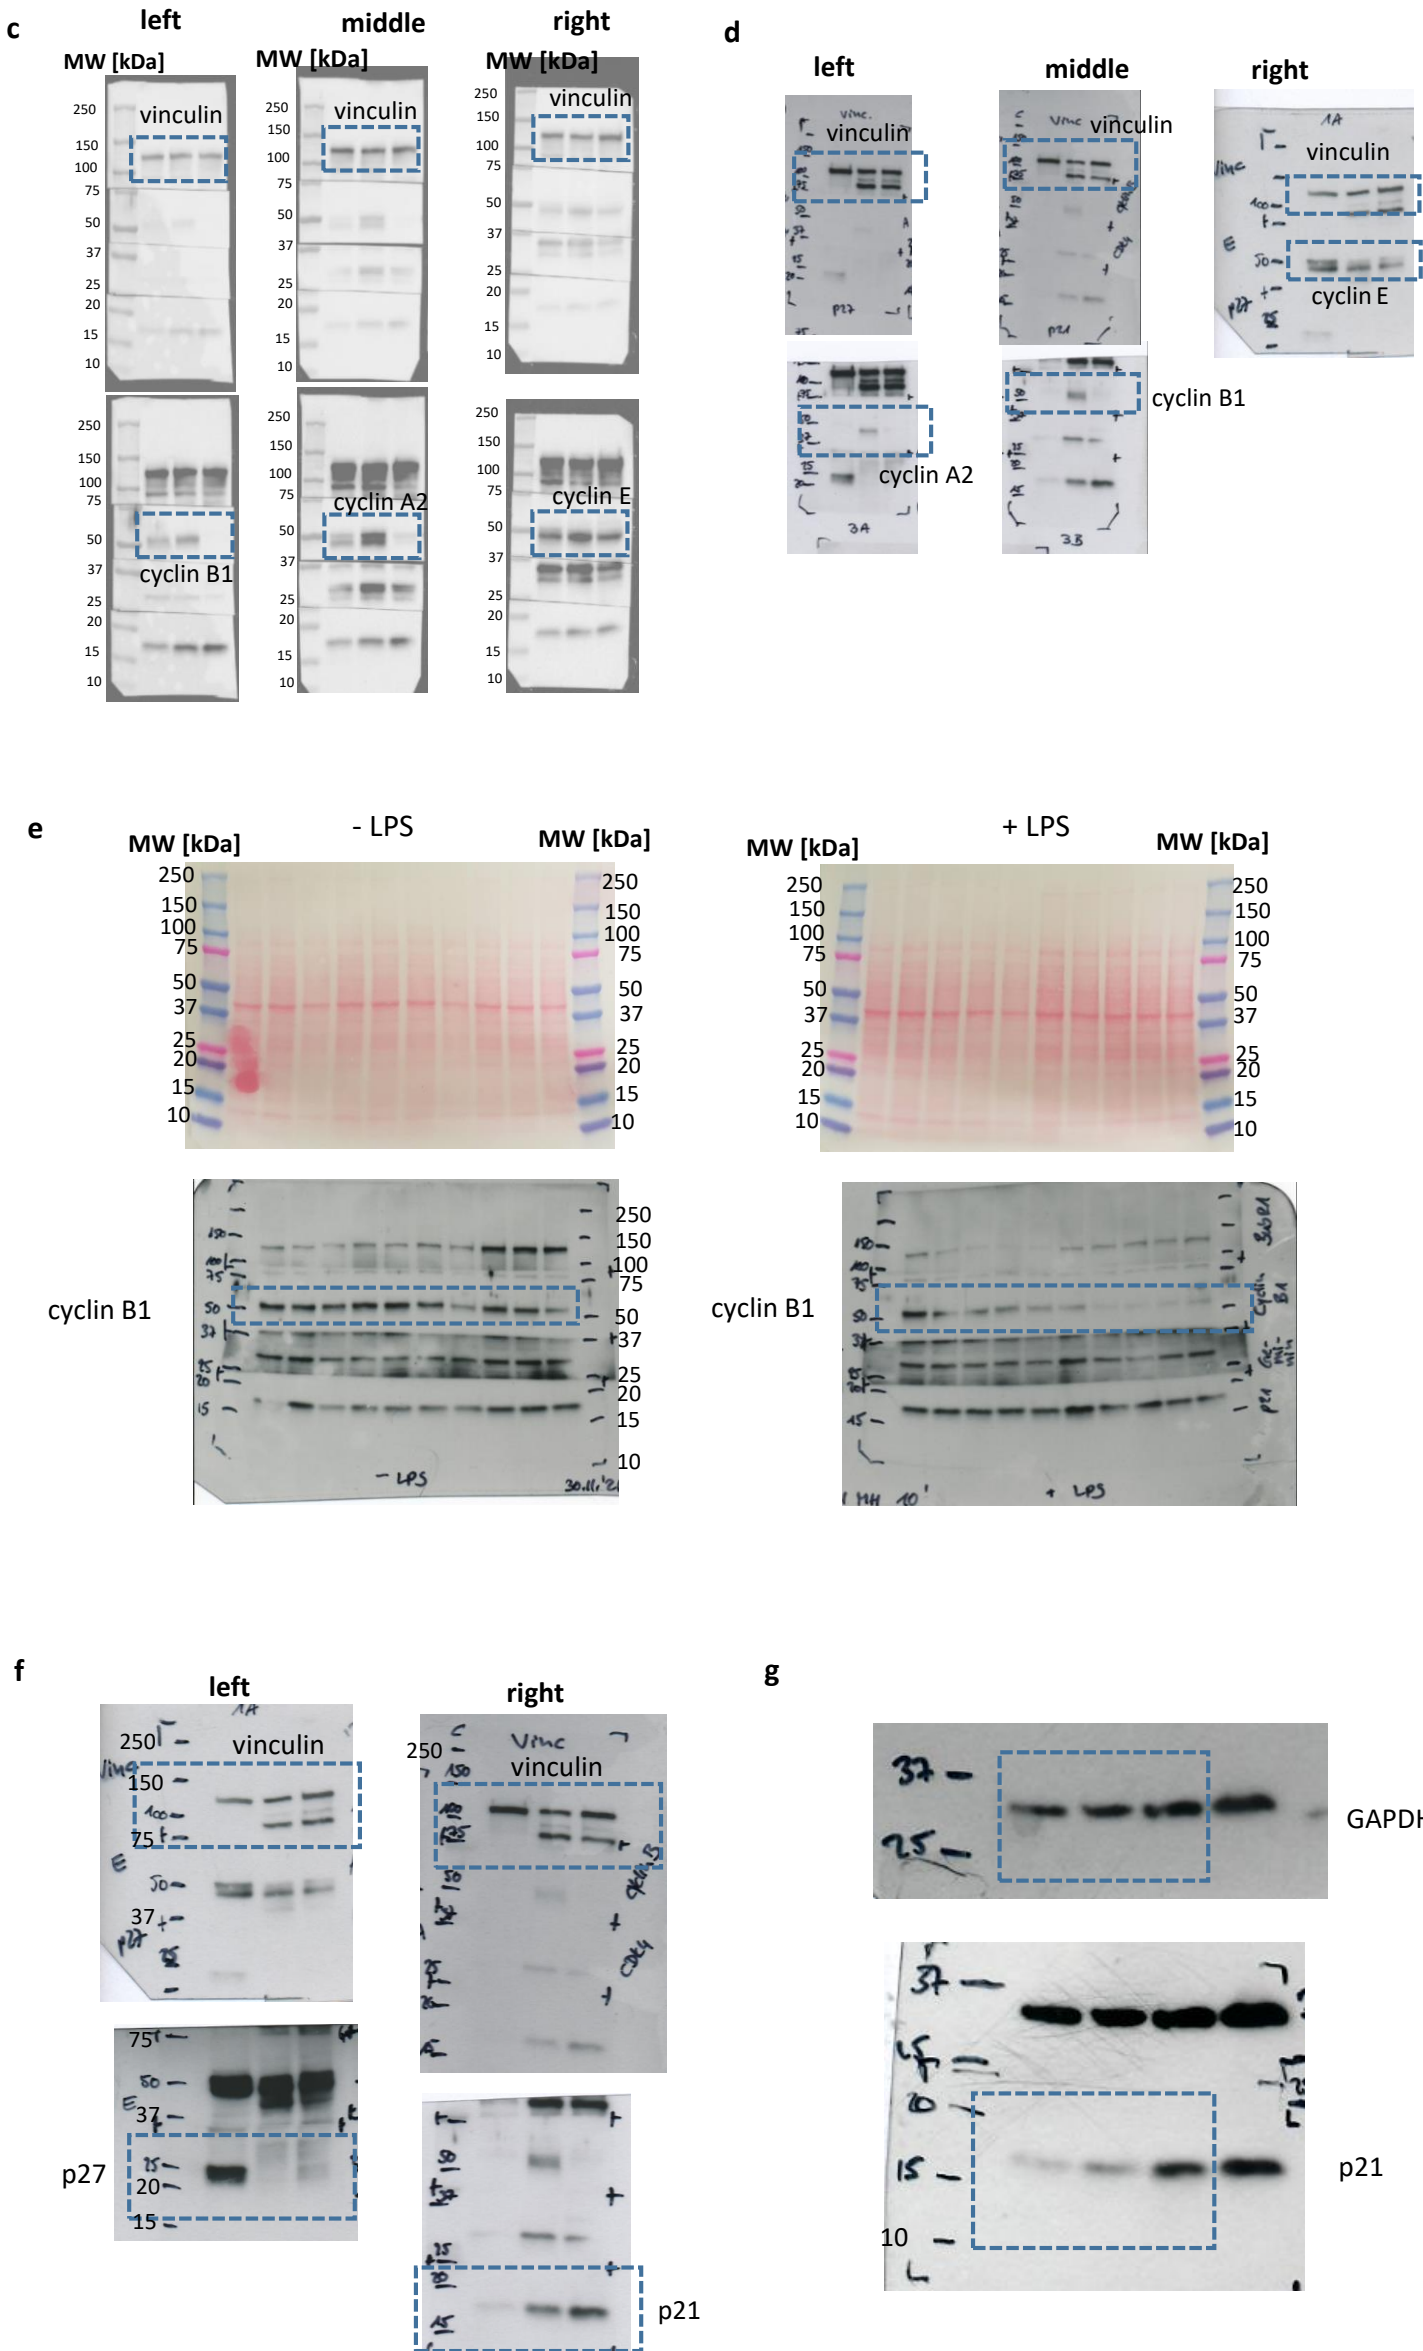

Supplement: JCB_202107134_SourceDataF3.pdf [file JCB_202107134_SourceDataF3.pdf]

Fig. S2

e

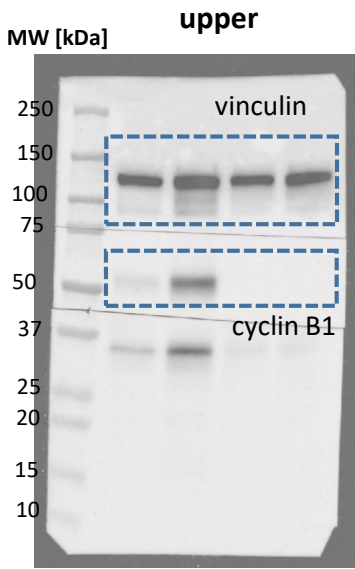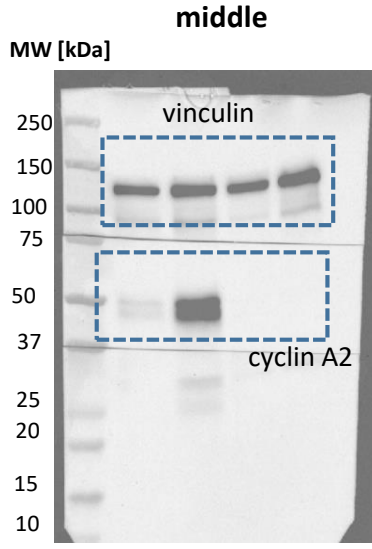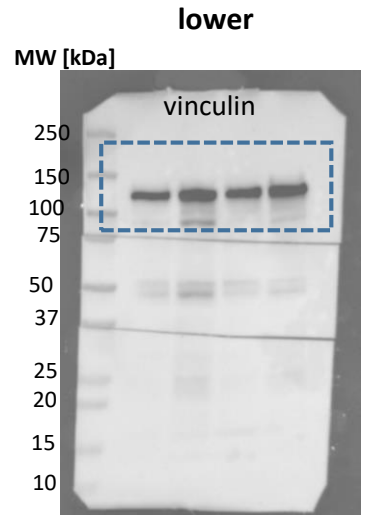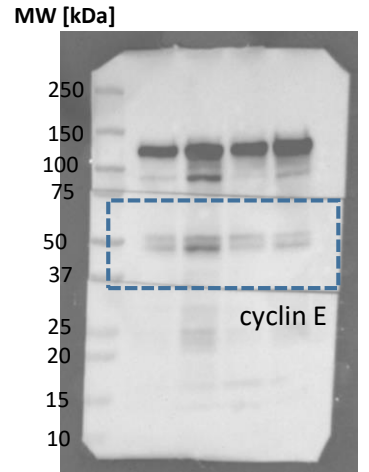

Supplement: JCB_202107134_SourceDataFS2.pdf [file JCB_202107134_SourceDataFS2.pdf]

**Fig. S4**

**b**

CETN2-GFP HOXB8-derived DCs  
sc. sg\_1 sg\_2 sc. Ladder

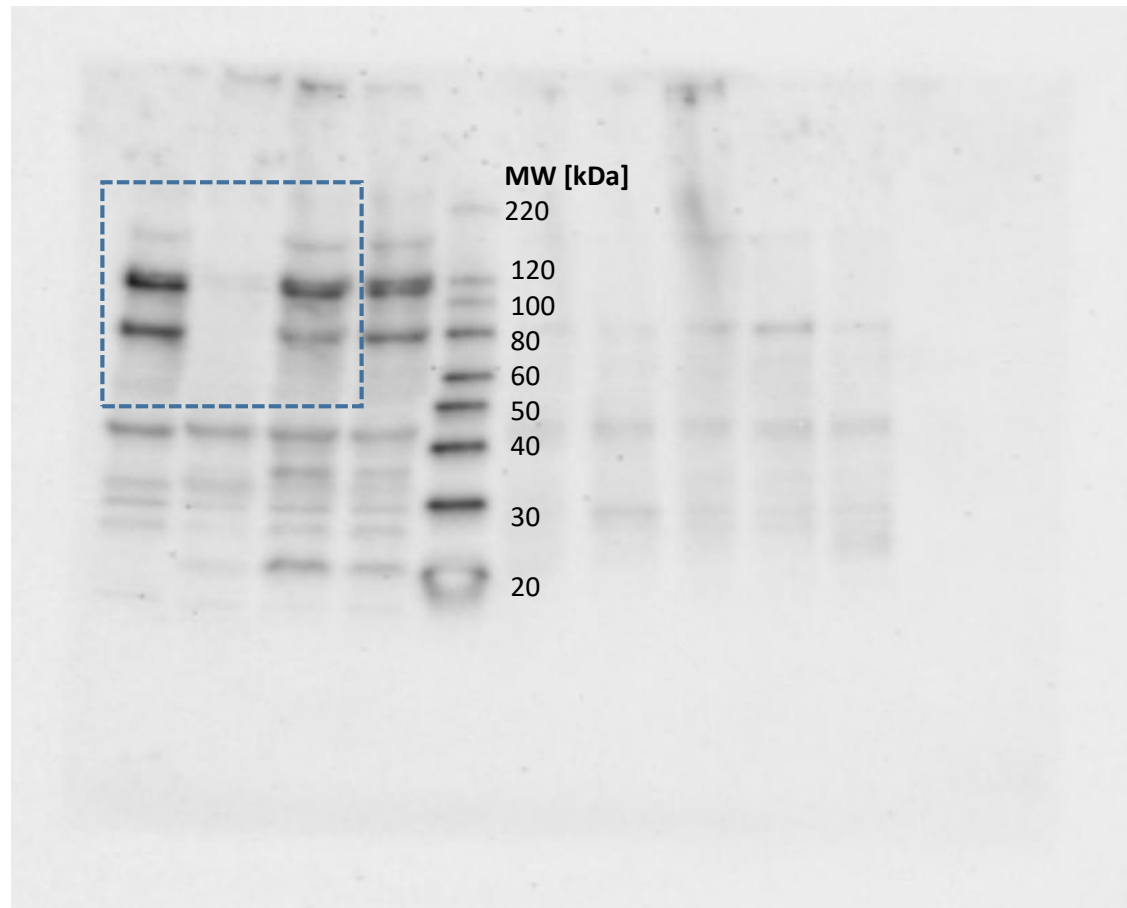

Supplement: JCB_202107134_SourceDataFS4.pdf [file JCB_202107134_SourceDataFS4.pdf]

Fig. S6

d

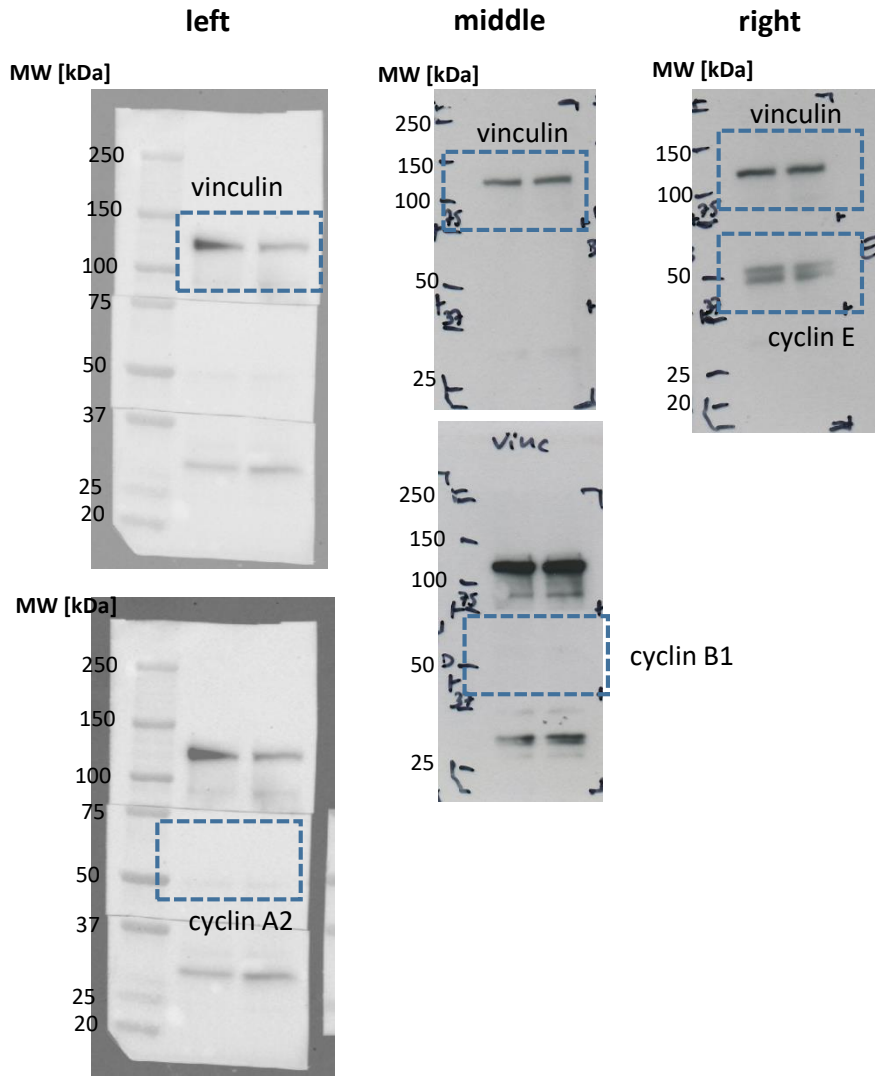

f

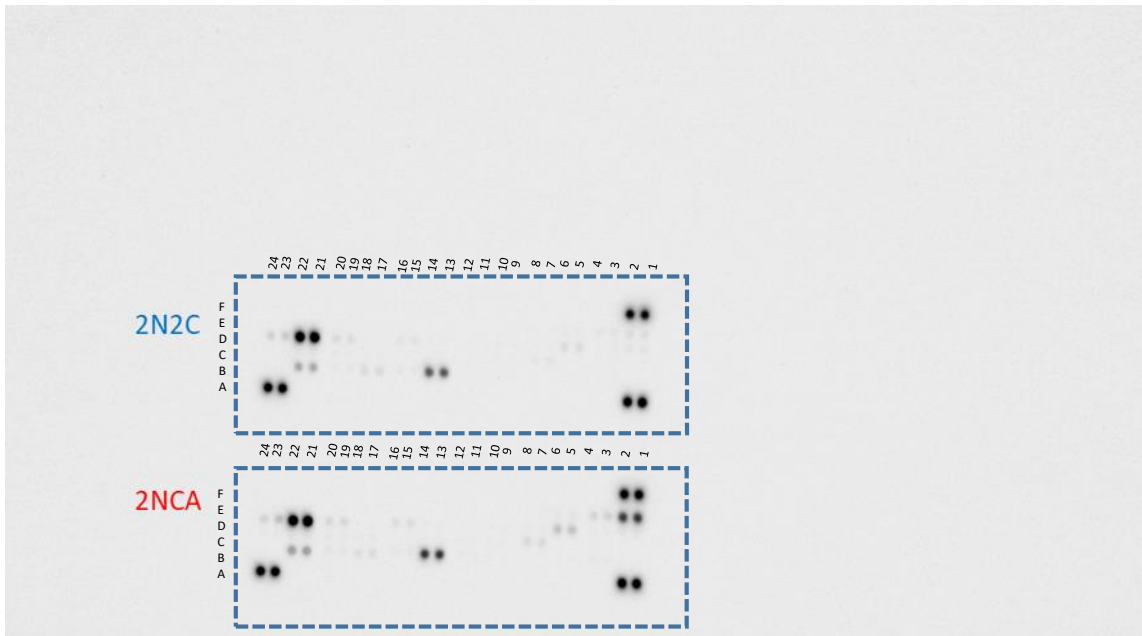

Supplement: JCB_202107134_SourceDataFS6.pdf [file JCB_202107134_SourceDataFS6.pdf]
